# Supplementary material
Source: PubMed Central journal article supplement (PMC7306433)

Supplementary figure S1

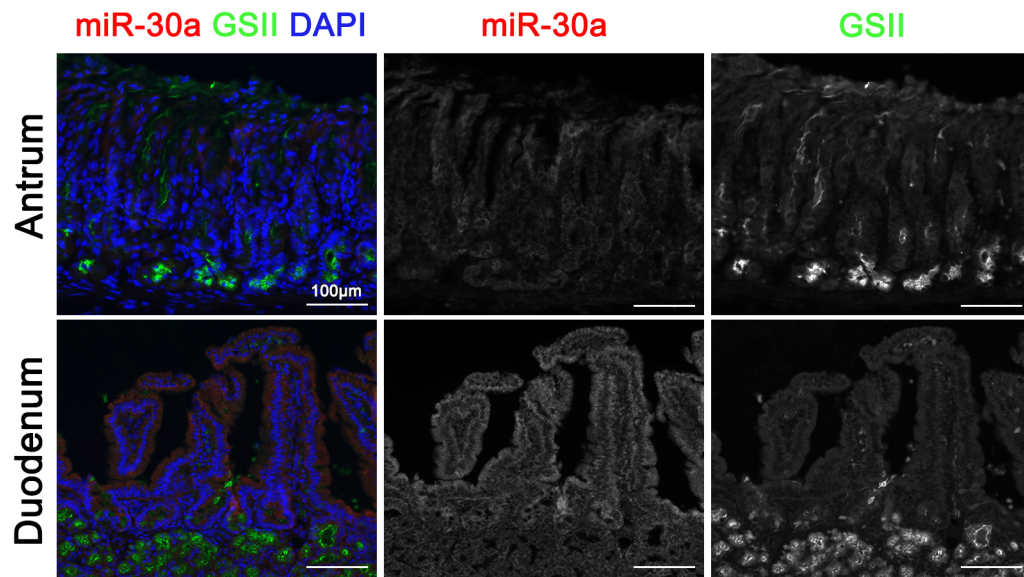

Supplement: NIHMS1569774-supplement-10120_2020_1052_MOESM1_ESM.pdf [file NIHMS1569774-supplement-10120_2020_1052_MOESM1_ESM.pdf]

Supplementary figure S2

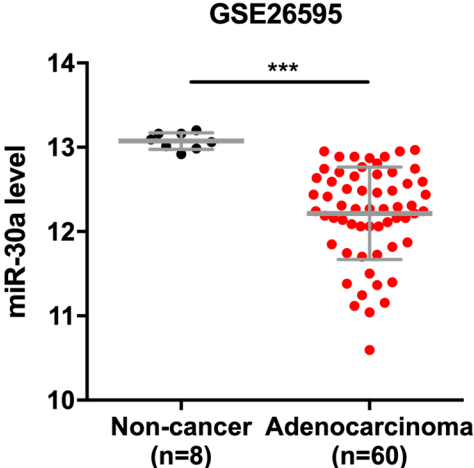

Supplement: NIHMS1569774-supplement-10120_2020_1052_MOESM2_ESM.pdf [file NIHMS1569774-supplement-10120_2020_1052_MOESM2_ESM.pdf]

Supplementary figure S3

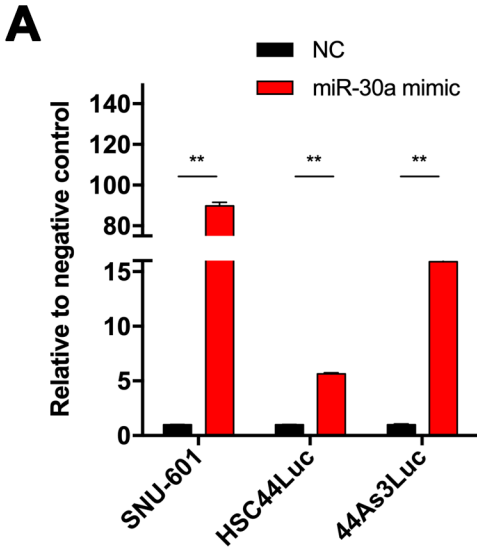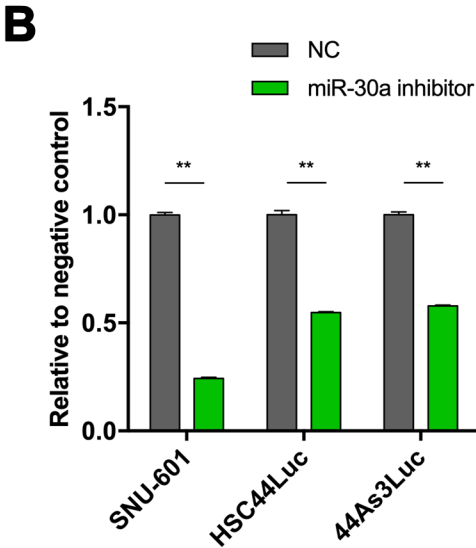

Supplement: NIHMS1569774-supplement-10120_2020_1052_MOESM3_ESM.pdf [file NIHMS1569774-supplement-10120_2020_1052_MOESM3_ESM.pdf]
